# Supplementary material for: A Prognostic Nomogram via Competing Risk Model with Patterns of Extracranial Metastasis in Elderly NSCLC Patients with Synchronous Brain-metastasis: A Large Population-based Study
Source: Research Square preprint supplement (doi:10.21203/rs.3.rs-1357913/v1), 2022-02-18
Supplement: Supplementary file 1 [file 4346c4cc26d8e04b13aca12c.docx]

|  | Train(n=2487) | | | | Test(n=2487) | | | | Whole(n=4974) | | | |
| --- | --- | --- | --- | --- | --- | --- | --- | --- | --- | --- | --- | --- |
|  | MA (n = 1123) | MB (n = 903) | MC (n = 461) | P value | MA (n = 1148) | MB (n = 896) | MC (n = 443) | P value | MA (n = 2271) | MB (n = 1799) | MC (n = 904) | P value |
| Age, n (%) | |  |  | 0.186 |  |  |  | 0.607 |  |  |  | 0.464 |
| <=74 | 480 (43) | 418 (46) | 215 (47) |  | 528 (46) | 397 (44) | 208 (47) |  | 1008 (44) | 815 (45) | 423 (47) |  |
| >74 | 643 (57) | 485 (54) | 246 (53) |  | 620 (54) | 499 (56) | 235 (53) |  | 1263 (56) | 984 (55) | 481 (53) |  |
| Race, n (%) | |  |  | 0.025 |  |  |  | 0.037 |  |  |  | < 0.001 |
| Black | 110 (10) | 77 (9) | 43 (9) |  | 119 (10) | 79 (9) | 32 (7) |  | 229 (10) | 156 (9) | 75 (8) |  |
| White | 920 (82) | 712 (79) | 365 (79) |  | 912 (79) | 697 (78) | 348 (79) |  | 1832 (81) | 1409 (78) | 713 (79) |  |
| Others | 93 (8) | 114 (13) | 53 (11) |  | 117 (10) | 120 (13) | 63 (14) |  | 210 (9) | 234 (13) | 116 (13) |  |
| Sex, n (%) | |  |  | 0.022 |  |  |  | 0.193 |  |  |  | 0.024 |
| Male | 569 (51) | 407 (45) | 236 (51) |  | 562 (49) | 439 (49) | 238 (54) |  | 1131 (50) | 846 (47) | 474 (52) |  |
| Female | 554 (49) | 496 (55) | 225 (49) |  | 586 (51) | 457 (51) | 205 (46) |  | 1140 (50) | 953 (53) | 430 (48) |  |
| AJCC.T, n (%) | |  |  | < 0.001 |  |  |  | < 0.001 |  |  |  | < 0.001 |
| T1 | 155 (14) | 65 (7) | 36 (8) |  | 177 (15) | 60 (7) | 39 (9) |  | 332 (15) | 125 (7) | 75 (8) |  |
| T2 | 396 (35) | 190 (21) | 111 (24) |  | 388 (34) | 180 (20) | 97 (22) |  | 784 (35) | 370 (21) | 208 (23) |  |
| T3 | 226 (20) | 208 (23) | 124 (27) |  | 223 (19) | 205 (23) | 117 (26) |  | 449 (20) | 413 (23) | 241 (27) |  |
| T4 | 196 (17) | 356 (39) | 119 (26) |  | 223 (19) | 362 (40) | 144 (33) |  | 419 (18) | 718 (40) | 263 (29) |  |
| Tx | 150 (13) | 84 (9) | 71 (15) |  | 137 (12) | 89 (10) | 46 (10) |  | 287 (13) | 173 (10) | 117 (13) |  |
| AJCC.N, n (%) | |  |  | < 0.001 |  |  |  | < 0.001 |  |  |  | < 0.001 |
| N0 | 333 (30) | 165 (18) | 67 (15) |  | 352 (31) | 195 (22) | 76 (17) |  | 685 (30) | 360 (20) | 143 (16) |  |
| N1 | 107 (10) | 63 (7) | 29 (6) |  | 115 (10) | 63 (7) | 42 (9) |  | 222 (10) | 126 (7) | 71 (8) |  |
| N2 | 474 (42) | 423 (47) | 234 (51) |  | 476 (41) | 406 (45) | 212 (48) |  | 950 (42) | 829 (46) | 446 (49) |  |
| N3 | 143 (13) | 204 (23) | 84 (18) |  | 140 (12) | 186 (21) | 87 (20) |  | 283 (12) | 390 (22) | 171 (19) |  |
| Nx | 66 (6) | 48 (5) | 47 (10) |  | 65 (6) | 46 (5) | 26 (6) |  | 131 (6) | 94 (5) | 73 (8) |  |
| Histology, n (%) | |  |  | 0.003 |  |  |  | 0.009 |  |  |  | < 0.001 |
| AC | 780 (69) | 684 (76) | 311 (67) |  | 797 (69) | 676 (75) | 326 (74) |  | 1577 (69) | 1360 (76) | 637 (70) |  |
| SSC | 188 (17) | 119 (13) | 73 (16) |  | 194 (17) | 110 (12) | 72 (16) |  | 382 (17) | 229 (13) | 145 (16) |  |
| NSCLC | 155 (14) | 100 (11) | 77 (17) |  | 157 (14) | 110 (12) | 45 (10) |  | 312 (14) | 210 (12) | 122 (13) |  |
| Chemoradiotherapy, n (%) | | |  | 0.002 |  |  |  | < 0.001 |  |  |  | < 0.001 |
| None | 193 (17) | 133 (15) | 99 (21) |  | 229 (20) | 151 (17) | 75 (17) |  | 422 (19) | 284 (16) | 174 (19) |  |
| Radiation | 424 (38) | 324 (36) | 142 (31) |  | 424 (37) | 307 (34) | 141 (32) |  | 848 (37) | 631 (35) | 283 (31) |  |
| Chemotherapy | 73 (7) | 78 (9) | 48 (10) |  | 55 (5) | 74 (8) | 56 (13) |  | 128 (6) | 152 (8) | 104 (12) |  |
| Both | 433 (39) | 368 (41) | 172 (37) |  | 440 (38) | 364 (41) | 171 (39) |  | 873 (38) | 732 (41) | 343 (38) |  |
| Chemoradiotherap2, n (%) | |  |  | 0.007 |  |  |  | 0.142 |  |  |  | 0.027 |
| None | 193 (17) | 133 (15) | 99 (21) |  | 229 (20) | 151 (17) | 75 (17) |  | 422 (19) | 284 (16) | 174 (19) |  |
| Yes | 930 (83) | 770 (85) | 362 (79) |  | 919 (80) | 745 (83) | 368 (83) |  | 1849 (81) | 1515 (84) | 730 (81) |  |

Abbreviations: AC, adenocarcinoma; SSC, squamous carcinoma; NSCLC , non-small cell lung carcinoma, nothing otherwise special.
