# Supplementary material for: A Prognostic Nomogram via Competing Risk Model with Patterns of Extracranial Metastasis in Elderly NSCLC Patients with Synchronous Brain-metastasis: A Large Population-based Study
Source: Research Square preprint supplement (doi:10.21203/rs.3.rs-1357913/v1), 2022-02-18
Supplement: Supplementary file 2 [file 7cf0ddf50ec2917751be0c27.docx]

|  | Train | | Test | | Whole | |
| --- | --- | --- | --- | --- | --- | --- |
|  | HR(95%CI) | P value | HR(95%CI) | P value | HR(95%CI) | P value |
| Mets subdivision | |  |  |  |  |  |
| MA | Ref |  | Ref |  | Ref |  |
| MB | 1.248  (1.133-1.374) | < 0.001 | 1.203  (1.094-1.323) | < 0.001 | 1.226  (1.146-1.312) | < 0.001 |
| MC | 1.892  (1.685-2.124) | < 0.001 | 1.815  (1.612-2.044) | < 0.001 | 1.856  (1.709-2.016) | < 0.001 |
| Age |  |  |  |  |  |  |
| <=74 | Ref |  | Ref |  | Ref |  |
| >74 | 1.093  (1.006-1.188) | 0.036 | 1.145  (1.053-1.244) | 0.001 | 1.118  (1.054-1.185) | < 0.001 |
| Race |  |  |  |  |  |  |
| Black | Ref |  | Ref |  | Ref |  |
| White | 1.083  (0.94-1.247) | 0.271 | 0.932  (0.81-1.074) | 0.33 | 1.005  (0.91-1.11) | 0.927 |
| Others | 0.777  (0.643-0.938) | 0.009 | 0.784  (0.655-0.939) | 0.008 | 0.785  (0.69-0.894) | < 0.001 |
| Sex |  |  |  |  |  |  |
| Male | Ref |  | Ref |  | Ref |  |
| Female | 0.869  (0.8-0.943) | < 0.001 | 0.85  (0.784-0.923) | < 0.001 | 0.862  (0.813-0.913) | < 0.001 |
| AJCC.T |  |  |  |  |  |  |
| T1 | Ref |  | Ref |  | Ref |  |
| T2 | 1.185  (1.018-1.379) | 0.029 | 1.173  (1.011-1.36) | 0.035 | 1.183  (1.065-1.315) | 0.002 |
| T3 | 1.353  (1.155-1.585) | < 0.001 | 1.367  (1.171-1.595) | < 0.001 | 1.36  (1.218-1.518) | < 0.001 |
| T4 | 1.236  (1.058-1.444) | 0.008 | 1.28  (1.101-1.488) | 0.001 | 1.261  (1.132-1.404) | < 0.001 |
| Tx | 1.187  (0.991-1.423) | 0.063 | 1.146  (0.958-1.371) | 0.137 | 1.167  (1.028-1.325) | 0.017 |
| AJCC.N |  |  |  |  |  |  |
| N0 | Ref |  | Ref |  | Ref |  |
| N1 | 1.013  (0.855-1.2) | 0.882 | 1.07  (0.913-1.255) | 0.401 | 1.048  (0.934-1.177) | 0.424 |
| N2 | 1.187  (1.065-1.322) | 0.002 | 1.228  (1.106-1.364) | < 0.001 | 1.205  (1.118-1.299) | < 0.001 |
| N3 | 1.279  (1.118-1.465) | < 0.001 | 1.332  (1.164-1.523) | < 0.001 | 1.302  (1.184-1.432) | < 0.001 |
| Nx | 0.941  (0.777-1.14) | 0.535 | 0.92  (0.757-1.119) | 0.405 | 0.935  (0.816-1.071) | 0.331 |
| Chemoradiotherapy | |  |  |  |  |  |
| None | Ref |  | Ref |  | Ref |  |
| Radiation | 0.848  (0.754-0.953) | 0.006 | 0.901  (0.802-1.012) | 0.08 | 0.874  (0.805-0.949) | 0.001 |
| Chetherapy | 0.306  (0.255-0.367) | < 0.001 | 0.29  (0.241-0.349) | < 0.001 | 0.298  (0.262-0.339) | < 0.001 |
| Both | 0.315  (0.279-0.357) | < 0.001 | 0.347  (0.308-0.392) | < 0.001 | 0.332  (0.305-0.362) | < 0.001 |
| Histology | |  |  |  |  |  |
| AC | Ref |  | Ref |  | Ref |  |
| SSC | 1.39  (1.237-1.561) | < 0.001 | 1.352  (1.205-1.518) | < 0.001 | 1.368  (1.261-1.485) | < 0.001 |
| NSCLC | 1.333  (1.181-1.505) | < 0.001 | 1.137  (1.004-1.288) | 0.043 | 1.226  (1.125-1.337) | < 0.001 |

Abbreviations: AC, adenocarcinoma; SSC, squamous carcinoma; NSCLC , non-small cell lung carcinoma, nothing otherwise special; Mets subdivision, extracranial metastasis subdivision; Ref, reference.
