# Supplementary material for: A Prognostic Nomogram via Competing Risk Model with Patterns of Extracranial Metastasis in Elderly NSCLC Patients with Synchronous Brain-metastasis: A Large Population-based Study
Source: Research Square preprint supplement (doi:10.21203/rs.3.rs-1357913/v1), 2022-02-18
Supplement: Supplementary file 3 [file 82c4d015c0aa79a8dac0f0a2.docx]

| Liver | Bone | Lung | Group | SHR（95%CI） | P value | Subcategory | SHR（95%CI） | P value |
| --- | --- | --- | --- | --- | --- | --- | --- | --- |
| Yes | Yes | Yes | a |  |  | MC | - | - |
| Yes | No | Yes | b | a vs b 1.09  (0.834-1.44) | 0.52 |
| Yes | No | No | c | b vs c 1.01  (0.786-1.3) | 0.94 |
| Yes | Yes | No | d | c vs d 1.1  (0.881-1.37) | 0.40 |
| No | Yes | No | e | d vs e 1.22  (1.05-1.42) | <0.01 | MB | MC vs MB 1.15  （1.05-1.26） | <0.01 |
| No | Yes | Yes | f | e vs f 0.98  (0.825-1.17) | 0.85 |
| No | No | Yes | g | f vs g 1.02  (0.928-1.11) | 0.73 |
| No | No | No | h | g vs h 1.12  (1.03-1.22) | 0.01 | MA | MB vs MA 1.11  (1.02-1.2) | <0.01 |
