# Supplementary material for: A Prognostic Nomogram via Competing Risk Model with Patterns of Extracranial Metastasis in Elderly NSCLC Patients with Synchronous Brain-metastasis: A Large Population-based Study
Source: Research Square preprint supplement (doi:10.21203/rs.3.rs-1357913/v1), 2022-02-18
Supplement: Supplementary file 4 [file 8328b8f3e501a90f72aa2d57.docx]

|  | Train | | Test | | Whole | |
| --- | --- | --- | --- | --- | --- | --- |
|  | SHR(95%CI) | P value | SHR(95%CI) | P value | SHR(95%CI) | P value |
| Mets subdivision | |  |  |  |  |  |
| MA | Ref |  | Ref |  | Ref |  |
| MB | 1.097  (0.998-1.206) | 0.05 | 1.145  (1.04-1.261) | 0.006 | 1.126  (1.053-1.205) | < 0.001 |
| MC | 1.392  (1.232-1.573) | < 0.001 | 1.534  (1.363-1.725) | < 0.001 | 1.46  (1.339-1.592) | < 0.001 |
| Age |  |  |  |  |  |  |
| <=74 | Ref |  | Ref |  | Ref |  |
| >74 | 1.06  (0.974-1.153) | 0.18 | 1.119  (1.03-1.216) | 0.008 | 1.092  (1.029-1.159) | 0.004 |
| Race |  |  |  |  |  |  |
| Black | Ref |  | Ref |  | Ref |  |
| White | 1.009  (0.874-1.166) | 0.9 | 1.01  (0.869-1.172) | 0.9 | 1.008  (0.909-1.118) | 0.88 |
| Others | 0.839  (0.694-1.014) | 0.069 | 0.91  (0.758-1.093) | 0.31 | 0.886(0.777-1.01) | 0.071 |
| Sex |  |  |  |  |  |  |
| Male | Ref |  | Ref |  | Ref |  |
| Female | 0.943  (0.868-1.024) | 0.16 | 0.919  (0.847-0.997) | 0.043 | 0.937  (0.884-0.994) | 0.03 |
| AJCC.T |  |  |  |  |  |  |
| T1 | Ref |  | Ref |  | Ref |  |
| T2 | 1.184  (1.021-1.373) | 0.026 | 1.121  (0.971-1.294) | 0.12 | 1.144  (1.031-1.269) | 0.011 |
| T3 | 1.261  (1.077-1.475) | 0.004 | 1.28  (1.101-1.487) | 0.001 | 1.261  (1.13-1.407) | < 0.001 |
| T4 | 1.242  (1.068-1.443) | 0.005 | 1.23  (1.065-1.422) | 0.005 | 1.232 (1.109-1.368) | < 0.001 |
| Tx | 1.212  (1.014-1.449) | 0.035 | 1.088  (0.908-1.304) | 0.36 | 1.153  (1.016-1.309) | 0.027 |
| AJCC.N |  |  |  |  |  |  |
| N0 | Ref |  | Ref |  | Ref |  |
| N1 | 0.869  (0.725-1.041) | 0.13 | 1.096  (0.944-1.273) | 0.23 | 0.979  (0.87-1.102) | 0.73 |
| N2 | 1.146  (1.029-1.277) | 0.013 | 1.195  (1.074-1.331) | 0.001 | 1.162  (1.077-1.254) | < 0.001 |
| N3 | 1.222  (1.067-1.399) | 0.004 | 1.193  (1.043-1.365) | 0.01 | 1.201  (1.092-1.321) | < 0.001 |
| Nx | 0.944  (0.772-1.154) | 0.57 | 0.993  (0.811-1.217) | 0.95 | 0.962  (0.833-1.11) | 0.59 |
| Chemoradiotherapy | |  |  |  |  |  |
| None | Ref |  | Ref |  | Ref |  |
| Radiation | 0.896  (0.78-1.03) | 0.12 | 0.931  (0.814-1.065) | 0.3 | 0.918  (0.833-1.011) | 0.083 |
| Chetherapy | 0.462  (0.386-0.554) | < 0.001 | 0.449  (0.377-0.534) | < 0.001 | 0.463  (0.408-0.524) | < 0.001 |
| Both | 0.502  (0.439-0.574) | < 0.001 | 0.5  (0.44-0.569) | < 0.001 | 0.509  (0.464-0.558) | < 0.001 |
| Histology | |  |  |  |  |  |
| AC | Ref |  | Ref |  | Ref |  |
| SSC | 0.987  (0.88-1.106) | 0.82 | 1.194  (1.063-1.341) | 0.003 | 1.239  (1.14-1.346) | < 0.001 |
| NSCLC | 1.191  (1.052-1.348) | 0.006 | 0.916  (0.795-1.055) | 0.22 | 1.068  (0.972-1.174) | 0.17 |

Abbreviations: AC, adenocarcinoma; SSC, squamous carcinoma; NSCLC , non-small cell lung carcinoma, nothing otherwise special.
