# Supplementary material for: A Prognostic Nomogram via Competing Risk Model with Patterns of Extracranial Metastasis in Elderly NSCLC Patients with Synchronous Brain-metastasis: A Large Population-based Study
Source: Research Square preprint supplement (doi:10.21203/rs.3.rs-1357913/v1), 2022-02-18
Supplement: Supplementary file 5 [file b96221333e8e4d9866699093.docx]

|  | Train | |
| --- | --- | --- |
|  | Coefficient | P value |
| Mets subdivision | |  |
| MA | Ref |  |
| MB | 0.10 | 0.04 |
| MC | 0.33 | < 0.01 |
| AJCC.T |  |  |
| T1 | Ref |  |
| T2 | 0.15 | 0.04 |
| T3 | 0.21 | <0.01 |
| T4 | 0.20 | <0.01 |
| Tx | 0.20 | 0.03 |
| AJCC.N |  |  |
| N0 | Ref |  |
| N1 | -0.14 | 0.14 |
| N2 | 0.12 | 0.03 |
| N3 | 0.19 | <0.01 |
| Nx | -0.06 | 0.57 |
| Chemoradiotherapy | |  |
| None | Ref |  |
| Radiation | -0.09 | 0.19 |
| Chemotherapy | -0.76 | < 0.01 |
| Both | -0.68 | < 0.01 |
| Histology | |  |
| AC | Ref |  |
| SSC | 0.26 | < 0.01 |
| NSCLC | 0.23 | < 0.01 |

Abbreviations: AC, adenocarcinoma; SSC, squamous carcinoma; NSCLC , non-small cell lung carcinoma, nothing otherwise special; Mets subdivision, extracranial metastasis subdivision; Ref, reference.
